# Supplementary material for: Magnetically Controlled Hyaluronic Acid–Maghemite Nanocomposites with Embedded Doxorubicin
Source: MDPI journal article supplement (doi:10.3390/polym15173644), 2023-09-04
Supplement: s1 [file s1]

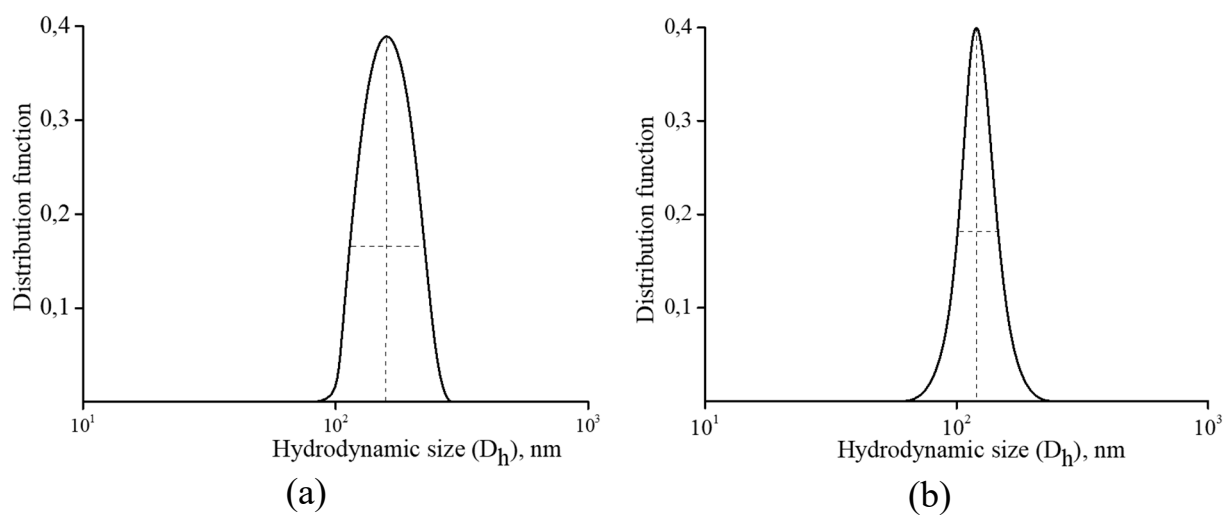

**Figure S1.** Distribution functions: (a) Initial HYAL and (b) composite (I) in physiological (0.15M NaCl) solution.

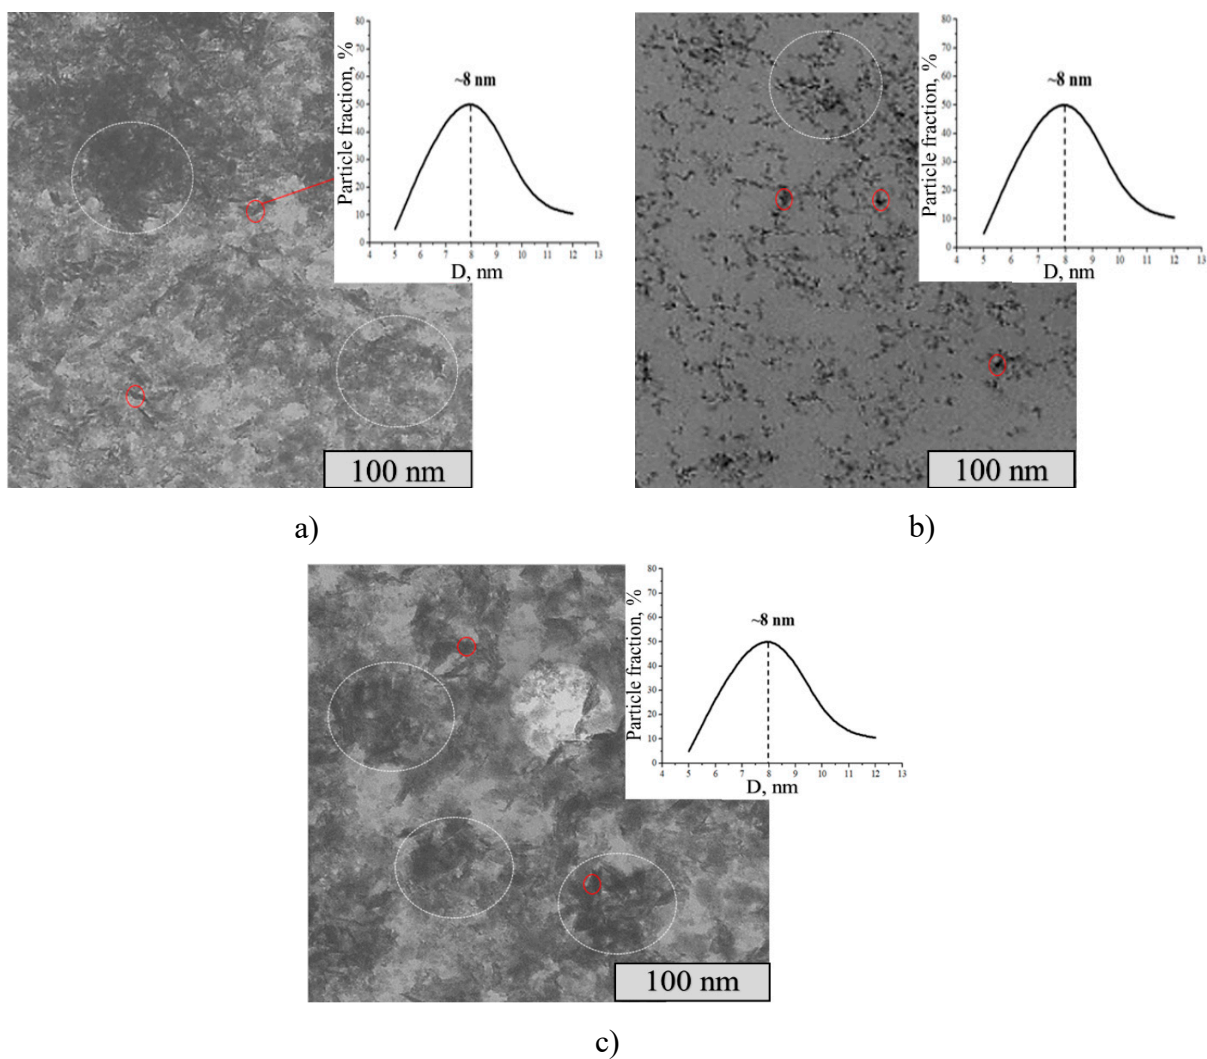

**Figure S2.** TEM images and size distribution functions (inset in top right) of nanoparticles in magnetic nanocomposites containing iron oxide: **a)** 5.12 % wt. (composite I); **b)** 14.0 % wt. (composite II) and **c)** 17.9% wt. (composite III).
